# Supplementary material
Source: HighWire-hosted journal article supplement (https://adc.bmj.com/content/103/6/565)
Supplement: inline-supplementary-material-1 [file inline-supplementary-material-1.docx]

**Supplementary data 1: R scripts added as separate files**

**JAGS script:**

###Model correcting for Differential Verification Bias###

model

{

###Prior distributions###

phi ~ dbeta(1,1)

ST ~ dbeta(1,1)

CT ~ dbeta(1,1)

SR1 ~ dbeta(151.125,3.875) # Sensitivity range R1: 95-100%

CR1 ~ dbeta(151.125,3.875) # Specificity range R1: 95-100%

SR2 ~ dbeta(31.5,3.5) # Sensitivity range R2: 80-100%

CR2 ~ dbeta(58.1,24.9) # Specificity range R2: 40-60%

VT1R1 ~ dunif(0,1)

VT0R1 ~ dunif(0,1)

VT1R2 ~ dunif(0,1)

VT0R2 ~ dunif(0,1)

###Probability data###

p1 <- phi*ST+(1-phi)*(1-CT)

p2 <- (SR1*phi*ST/(phi*ST+(1-phi)*(1-CT))+(1-CR1)*(1-phi)*(1-CT)/(phi*ST+(1-phi)*(1-CT)))

p3 <- (SR1*phi*(1-ST)/(phi*(1-ST)+(1-phi)*CT)+(1-CR1)*(1-phi)*CT/(phi*(1-ST)+(1-phi)*CT))

p4 <- (SR2*phi*ST/(phi*ST+(1-phi)*(1-CT))+(1-CR2)*(1-phi)*(1-CT)/(phi*ST+(1-phi)*(1-CT)))

p5 <- (SR2*phi*(1-ST)/(phi*(1-ST)+(1-phi)*CT)+(1-CR2)*(1-phi)*CT/(phi*(1-ST)+(1-phi)*CT))

###Likelihood observed data###

#Stage 1

T1 ~ dbin(p1,n)

#Verification Stage

nT1R1 ~ dbin(VT1R1,T1)

n0 <- n-T1

nT0R1 ~ dbin(VT0R1,n0)

nT1R2 ~ dbin(VT1R2,T1)

nT0R2 ~ dbin(VT0R2,n0)

#Stage 2

T1R11 ~ dbin(p2,nT1R1)

T0R11 ~ dbin(p3,nT0R1)

T1R21 ~ dbin(p4,nT1R2)

T0R21 ~ dbin(p5,nT0R2)

#Predictive values

PPVT <- ST*phi/(ST*phi+(1-CT)*(1-phi))

NPVT <- CT*(1-phi)/(CT*(1-phi)+(1-ST)*phi)

#Accuracy measures T with respect to Reference test 1

STR1 <- p2*p1/(p2*p1+p3*(1-p1))

CTR1 <- (1-p3)*(1-p1)/((1-p2)*p1+(1-p3)*(1-p1))

PPVTR1 <- p2

NPVTR1 <- 1-p3

#Accuracy measures T with respect to Reference test 2

STR2 <- p4*p1/(p4*p1+p5*(1-p1))

CTR2 <- (1-p5)*(1-p1)/((1-p4)*p1+(1-p5)*(1-p1))

PPVTR2 <- p4

NPVTR2 <- 1-p5

}
