# Supplementary material
Source: HighWire-hosted journal article supplement (https://adc.bmj.com/content/103/6/565)
Supplement: inline-supplementary-material-2 [file inline-supplementary-material-2.docx]

**Supplementary file 2: Diagnostic accuracy measures of the calprotectin and calgranulin-C test to diagnose IBD in children using predefined thresholds (respectively 50 µg/g and 0.75 µg/g) and optimal thresholds (respectively 400 µg/g and 0.75 µg/g).**

Estimates calculated with the Bayesian statistical method are shown with the 95% credible interval

| **Patient spectrum** | **Diagnostic accuracy characteristics** | **Calprotectin**  **(50 µg/g)** | **Calgranulin-C**  **(0.75 µg/g)** | **Calprotectine**  **(400 µg/g)** |
| --- | --- | --- | --- | --- |
| **High risk for IBD (endoscopic verification)** | **Sensitivity** | 97.4 (94.1-99.1) | 81.7 (73.1-88.7) | 92.0 (85.5-96.3) |
| **Specificity** | 69.9 (62.2-77.1) | 96.4 (93.4-98.3) | 96.6 (93.6-98.5) |
| **Negative predictive value** | 97.2 (93.7-99.0) | 92.2 (88.1-95.3) | 96.3 (93.1-98.3) |
| **Positive predictive value** | 71.6 (63.2-79.0) | 91.0 (83.7-95.6) | 92.7 (86.2-96.6) |
| **Low risk for IBD (verification by follow up)** | **Sensitivity** | 88.7 (83.8-92.5) | 74.8 (65.2-82.7) | 79.2 (71.2-85.7) |
| **Specificity** | 65.3 (56.5-73.8) | 93.3 (87.9-97.0) | 93.1 (87.1-97.1) |
| **Negative predictive value** | 87.2 (82.2-91.3) | 89.4 (84.9-92.8) | 89.7 (85.6-93.0) |
| **Positive predictive value** | 68.5 (57.5-77.8) | 83.3 (69.5-92.7) | 85.5 (72.4-94.1) |
| **Complete cohort**  **(verification with either reference test)** | **Sensitivity** | 99.5 (97.2-100) | 96.8 (87.1-99.9) | 98.7 (93.8-100) |
| **Specificity** | 71.3 (63.3-79.0) | 97.3 (94.1-99.4) | 97.7 (94.5-99.7) |
| **Negative predictive value** | 99.4 (97.0-100) | 98.8 (94.9-100) | 99.4 (97.2-100) |
| **Positive predictive value** | 72.7 (63.8-81.0) | 92.7 (84.6-98.4) | 94.8 (87.8-99.3) |
